# Supplementary material for: Cohort profile of PLUTO: a perioperative biobank focusing on prediction and early diagnosis of postoperative complications
Source: PubMed Central journal article supplement — BMJ Open. 2023 Apr 19;13(4):e068970. doi: 10.1136/bmjopen-2022-068970 (PMC10124280; doi:10.1136/bmjopen-2022-068970), 2023-04-19
Supplement: bmjopen-2022-068970supp003.pdf [file bmjopen-2022-068970supp003.pdf]

## Supplementary file 3 – List of included comorbidities and medication registration

### Comorbidities

|                                     |                                                                                                                                                                                                                                                                      |
|-------------------------------------|----------------------------------------------------------------------------------------------------------------------------------------------------------------------------------------------------------------------------------------------------------------------|
| Severe coronary disease             | Severe cardiovascular insufficiency. Angina or dyspnea in rest or minimal exercise (NYHA IV), or based on severe valvular disease.                                                                                                                                   |
| Chronic ulcera/cellulitis           | Decubitus, chronic venous insufficiency, chronic ulcera (all skin defects or open wounds existing > 1 month).                                                                                                                                                        |
| Asplenia                            | Congenital, acquired or functional asplenia.                                                                                                                                                                                                                         |
| Depression / bipolar disorder       | Chronic (>1 month pre-admission) use of antidepressants or documented episode of depression in the patients' history up to 5 years before admission.                                                                                                                 |
| Myocardial infarction               | Myocardial infarction > 1 week before admission; must be diagnosed based on ECG-abnormalities and/or enzyme abnormalities.                                                                                                                                           |
| Heart failure                       | Documented chronic NYHA II-IV heart failure or patients with ejection fraction below 45% (documented on echocardiography < 2 years prior to admission) or orthopnea (for which chronic prescription of diuretic medication).                                         |
| Peripheral vascular disease         | Patients with intermittent claudication, patients treated with PTA/bypass surgery because of arterial insufficiency or gangrene and patients with a thoracic or abdominal aneurysms of more than 6 cm or dissection, unless atherosclerosis is not the main problem. |
| Hypertension                        | Chronic (>1 month) known hypertension and/or patients using antihypertensive medication.                                                                                                                                                                             |
| Severe pulmonary disease            | Chronic restrictive, obstructive or vascular pulmonary disease resulting in severe functional limitations.                                                                                                                                                           |
| COPD                                | Use of bronchodilators and/or corticosteroids because of chronic obstructive pulmonary disease (> 6 months).                                                                                                                                                         |
| Chronic O <sub>2</sub> therapy      | Continuous or intermittent oxygen use in extramural setting                                                                                                                                                                                                          |
| Chronic home mechanical ventilation | All forms of chronic mechanical ventilation in an extramural setting (both intermittent CPAP and continuous tracheal ventilation).                                                                                                                                   |
| Cerebrovascular disease             | Transient ischemic attack, cerebrovascular accident or subarachnoid hemorrhage.                                                                                                                                                                                      |
| Hemiplegia                          | Irreversible paresis of arm and leg with severe handicap or decreased mobility caused by a cerebrovascular accident.                                                                                                                                                 |
| Dementia                            | Dementia diagnosed by geriatrician or neurologist prior to admission.                                                                                                                                                                                                |
| Renal insufficiency                 | Increased serum creatinine > 177 µmol/L and documented as chronic renal failure/insufficiency prior to admission.                                                                                                                                                    |

|                                                     |                                                                                                                                                                                                                                                 |
|-----------------------------------------------------|-------------------------------------------------------------------------------------------------------------------------------------------------------------------------------------------------------------------------------------------------|
| Dialysis dependent                                  | Chronic dialysis patient, either hemodialysis or peritoneal dialysis for more than 1 month prior to admission.                                                                                                                                  |
| Liver cirrhosis                                     | Portal hypertension with positive liver biopsy and/or episode of upper gastro-intestinal bleeding caused by portal hypertension and/or episode of hepatic encephalopathy / coma due to liver failure.                                           |
| Non-metastasized tumor                              | Neoplasm without metastases confirmed by pathology and/or clinically evident prior to admission. Hematological malignancies do not classify into this definition.                                                                               |
| Metastasized tumor                                  | Neoplasm with metastases (stage IV) confirmed by pathology and/or clinically evident prior to admission.                                                                                                                                        |
| Hematological malignancy                            | Diagnosis of lymphoma, leukemia, or multiple myeloma (M Kahler) prior to admission.                                                                                                                                                             |
| Connective tissue disease / rheumatological disease | Diagnosis of rheumatological disease (SLE, MCTD, polymyalgia, rheumatoid arthritis and polymyositis, vasculitis such as M. Wegener for example, diagnosed by internal specialist or rheumatologist.                                             |
| Dyspepsia and/or ulcer disease                      | Treatment for chronic gastric ulcer diagnosed in the previous 5 years prior to admission.                                                                                                                                                       |
| Immunodeficiency                                    | Use of immunosuppressants at the time of admission, and/or chemo/radiotherapy in the year prior to admission, and/or documented humoral or cellular deficiency.                                                                                 |
| HIV-infection                                       | Documented HIV-seropositivity prior to admission or treatment with antiretroviral medication (with or without detectable viral load, with or without AIDS).                                                                                     |
| AIDS                                                | HIV infection with CD4 < 200 and/or clinical complications.                                                                                                                                                                                     |
| Diabetes                                            | Use of insulin and/or oral antidiabetics in the period prior to admission.                                                                                                                                                                      |
| Diabetic end-organ damage                           | Diabetes mellitus and end-organ damage prior to admission. A clear link to diabetes does not have to be proven.                                                                                                                                 |
| Thyroid or other endocrine disease                  | Hypothyroidism, hyperthyroidism and/or other endocrine disease.                                                                                                                                                                                 |
| Nursing home                                        | Patient lives in a home where permanent care and support of activities of daily living is provided.                                                                                                                                             |
| Alcohol- or drugs addiction                         | Suspicion of negative influence on daily functioning in patients with recent (<1 year) alcohol or drugs misuse that is evident from documentation or use of more than 4 glasses of alcohol a day or use of drugs apparent from patient history. |
| Current alcoholabusus                               | Current use of more than 3 glasses of alcohol a day, document in medical history but no direct negative consequences for daily functioning.                                                                                                     |
| Current smoker                                      | Current smoker documented in medical history.                                                                                                                                                                                                   |

## Medication use

We register the following medication used at home:

- Beta blockers
- Other anti-arhythmics
- Diuretics
- Calcium antagonists
- ACE inhibitors, angiotensin receptor blockers
- Statins
- Other lipid lowering drugs
- Thrombocyte aggregation inhibitors
- Anticoagulants
- NSAIDs / COX2 inhibitors
- Proton pump inhibitors, H2 antagonists
- Corticosteroids
- Other immunosuppressants
- Bronchodilators
- Cytostatics
- Oral antidiabetics
- Insulin
- Antirheumatic medication
- Benzodiazepines
- Anti-epileptics
- Antipsychotics
- Antiparkinson medication
- Migraine medication
- Antimicrobial medication
- Opioids
- No medication use (for validation)
